1 **Title:** Characterization of the mycobiome of the seagrass, *Zostera marina*, reveals putative  
2 associations with marine chytrids

3

4 **Authors:** Cassandra L. Ettinger<sup>1,2</sup>, Jonathan A. Eisen<sup>1,2,3</sup>

5

6 <sup>1</sup>Genome Center, University of California, Davis, CA, United States

7 <sup>2</sup>Department of Evolution and Ecology, University of California, Davis, CA, United States

8 <sup>3</sup>Department of Medical Microbiology and Immunology, University of California, Davis, Davis,  
9 CA, United States

10

11 **Corresponding Author:**

12 Cassandra L. Ettinger

13 Email address: clettinger@ucdavis.edu

14

15 **Keywords:** seagrass, *Zostera marina*, mycobiome, marine fungi, ITS, Lobulomycetales,  
16 Chytridiomycota

17

18

19

20

21

22

23

24

25

26

27

28

29

30

31

32

33

34

35

36

37

38

39

40

41 **Abstract**

42  
43  
44  
45  
46  
47  
48  
49  
50  
51  
52  
53  
54  
55  
56  
57  
58  
59  
60  
61  
62  
63  
64  
65  
66  
67  
68  
69  
70  
71  
72  
73  
74  
75  
76  
77  
78  
79  
80

Seagrasses are globally distributed marine flowering plants that are foundation species in coastal ecosystems. Seagrass beds play essential roles as habitats and hatcheries, in nutrient cycling and in protecting the coastline from erosion. Although many studies have focused on seagrass ecology, only a limited number have investigated their associated fungi. In terrestrial systems, fungi can have beneficial and detrimental effects on plant fitness. However, not much is known about marine fungi and even less is known about seagrass associated fungi. Here we used culture-independent sequencing of the ribosomal internal transcribed spacer (ITS) region to characterize the taxonomic diversity of fungi associated with the seagrass, *Zostera marina*. We sampled from two *Z. marina* beds in Bodega Bay over three time points to investigate fungal diversity within and between plants. Our results indicate that there are many fungal taxa for which a taxonomic assignment cannot be made living on and inside *Z. marina* leaves, roots and rhizomes and that these plant tissues harbor distinct fungal communities. The most prevalent ITS amplicon sequence variant (ASV) associated with *Z. marina* leaves was classified as fungal, but could not initially be assigned to a fungal phylum. We then used PCR with a primer targeting unique regions of the ITS2 region of this ASV and an existing primer for the fungal 28S rRNA gene to amplify part of the 28S rRNA gene region and link it to this ASV. Sequencing and phylogenetic analysis of the resulting partial 28S rRNA gene revealed that the organism that this ASV comes from is a member of Novel Clade SW-I in the order Lobulomycetales in the phylum Chytridiomycota. This clade includes known parasites of freshwater diatoms and algae and it is possible this chytrid is directly infecting *Z. marina* leaf tissues. This work highlights a need for further studies focusing on marine fungi and the potential importance of these understudied communities to the larger seagrass ecosystem.

## 81 Introduction

82

83 Seagrasses are fully submerged marine flowering plants (angiosperms) that play essential roles in  
84 marine ecosystems as foundation species. Although angiosperms are the most diverse terrestrial  
85 plant group with over 250,000 species, there are only around 70 species of seagrasses. There are  
86 three main lineages of seagrass in the order Alismatales that separately moved into and adapted  
87 to the marine ecosystem through convergent evolution between 70 and 100 million years ago  
88 (Les et al., 1997; Wissler et al., 2011). Seagrasses are important keystone species in most coastal  
89 environments around the world with ecosystem services comparable to those of tropical  
90 rainforests (Costanza et al., 1997). However, seagrass beds are increasingly impacted by climate  
91 change, pollution and habitat fragmentation and restoration is expensive and has a low success  
92 rate (Orth et al., 2006). Although many studies have focused on the ecological importance of  
93 seagrasses, relatively little is known about the fungi associated with these species.

94

95 Fungi are known to affect land plant fitness both in detrimental ways (e.g., as pathogens) and  
96 beneficial ways ( e.g., mycorrhizae are involved in facilitating phosphorus and nitrogen uptake  
97 for their plant hosts (Bonfante and Anca, 2009)). It is estimated that 82-85% of angiosperm  
98 species have mycorrhizal fungal associations (Radhika and Rodrigues, 2007; Wang and Qiu,  
99 2006). Mycorrhizae were previously thought to not colonize aquatic environments, but have  
100 since been found in wetlands, estuaries, mangrove forests and freshwater ecosystems (Beck-  
101 Nielsen and Madsen, 2001; Bohrer et al., 2004; Kohout et al., 2012; Radhika and Rodrigues,  
102 2007; Šraj-Kržič et al., 2006). Mycorrhizal associations are believed to be at least 400 million  
103 years old, critical for plant terrestrialization (Humphreys et al., 2010; Redecker et al., 2000;  
104 Wang et al., 2010) and the ancestral state for angiosperms (Brundrett, 2002). Despite their  
105 importance to land plants, seagrasses are believed to not form mycorrhizal associations (Nielsen  
106 et al., 1999), even though freshwater relatives of seagrasses have been observed to sporadically  
107 form mycorrhizal associations (Beck-Nielsen and Madsen, 2001; Brundrett, 2009; Clayton and  
108 Bagyaraj, 1984; Khan and Belik, 1995; Radhika and Rodrigues, 2007; Šraj-Kržič et al., 2006;  
109 Wang and Qiu, 2006; Wigand and Court Stevenson, 1994).

110

111 In contrast to their apparent lack of mycorrhizal associations, some studies of seagrasses have  
112 observed associations with novel fungal endophytes similar to dark septate endophytes (DSE)  
113 common in land plants (Borovec and Vohník, 2018; Torta et al., 2015; Vohník et al., 2015, 2016,  
114 2017, 2019). DSE are a morphology based type and not a phylogenetic group, and are largely  
115 uncharacterized. In some cases, DSEs have been shown to transfer nitrogen and receive carbon  
116 from plants as well as increase overall plant nutrient content and growth (Porrás-Alfaro and  
117 Bayman, 2011; Usuki and Narisawa, 2007). DSEs are not the only fungi that have been observed  
118 to form associations with seagrasses. Additional culture based studies have found fungi  
119 associated with the leaves, roots and rhizomes of different seagrasses; however, many of these  
120 studies often conflict on the prevalence and taxonomic identities of the fungi observed and suffer

121 from the limitations of culture-based methods (Cuomo et al., 1985; Devarajan and  
122 Suryanarayanan, 2002; Gnavi et al., 2014; Kirichuk and Pivkin, 2015; Kuo, 1984; Ling et al.,  
123 2015; Mata and Cebrián, 2013; Newell, 1981; Panno et al., 2013; Phongpaichit and Supaphon,  
124 2014; Sakayaroj et al., 2010; Shoemaker and Wyllie-Echeverria, 2013; Supaphon et al., 2013,  
125 2017; Torta et al., 2015; Venkatachalam, 2015; Venkatachalam et al., 2015; Vohník et al., 2016).  
126 This is compounded by the fact that marine fungi are understudied and that marine fungal culture  
127 collections are limited with only around ~1100 cultured isolates, despite estimates that there are  
128 10,000 or more marine fungal species (Amend et al., 2019; Jones et al., 2015; Jones and Gareth  
129 Jones, 2011). Here, we use culture-independent methods to characterize the taxonomic diversity  
130 of fungi associated with the seagrass, *Z. marina*, in order to build a framework from which we  
131 can begin to determine the evolutionary, ecological, and functional importance of these  
132 associations.

133

## 134 **Methods**

### 135 *Sample collection*

136

137 Roots, leaves and rhizome tissues from individual *Z. marina* plants and adjacent sediment were  
138 collected by coring into the sediment using a 2.375 inch diameter modified PVC pipe  
139 (McMaster-Carr, Elmhurst, IL, USA). PVC pipes were modified such that one end of the pipe  
140 was cut at an angle to make insertion into the sediment easier. Samples were collected from two  
141 sites in Bodega Bay, CA, Gaffney Point (GPS: 38°18'45.05"N, 123° 3'16.66"W) and Westside  
142 Point (GPS: 38°19'10.67"N, 123° 3'13.71"W), at three timepoints two weeks apart spanning  
143 July-August 2016. Samples from GP were collected only at the first timepoint. Samples were  
144 dissected using sterile scissors into different bulk sample types (e.g. roots, leaves, rhizome  
145 tissues) in the field, placed into 1.5 mL centrifuge tubes which were immediately placed on dry  
146 ice for transport and then kept at -80 °C until analyzed. Sediment was collected from the 2.375  
147 inch PVC pipe using an 11 mm diameter straw which was placed directly next to the individual  
148 seagrass shoot tissue in order to assure sediment was collected as close to the plant as possible.  
149 For the third timepoint (T3), multiple samples were collected from the same plant. Leaf tissue  
150 was cut into ~5 inch long segments moving along the length of the leaf tissue, individual roots  
151 were collected and an additional 7 mm diameter straw core was obtained and then dissected into  
152 ~1.5 cm sections of sediment. Cores of unvegetated sediment from between sites were obtained  
153 as a biological control at each time point. For sample sizes, refer to Tables S1-3.

154

### 155 *Molecular methods*

156

157 DNA was extracted from samples with the PowerSoil DNA Isolation kit (MO BIO Laboratories,  
158 Inc., Carlsbad, CA, USA) with minor changes to the manufacturer's protocol as follows. To  
159 improve fungal lysis, samples were heated at 70 °C for 10 minutes between steps 4 and 5 as

160 suggested by the manufacturer. For step 5, samples were bead beaten on the homogenize setting  
161 for 1 minute using a BioSpec Products mini-bead beater. Samples were placed into randomized  
162 blocks prior to extraction using a random number generator.

163  
164 In order to obtain loosely associated, or epiphytic, fungi, tissue samples were washed in 1 mL of  
165 a 1:50 dilution of Redford buffer solution (1 M Tris-HCL, 0.5 M NaEDTA, 1.2% Triton-X)  
166 (Kadivar and Stapleton, 2003; Kembel et al., 2014). Samples were left in this solution for 5  
167 minutes during which they were periodically vortexed. Tissues were then removed and placed  
168 into a new microcentrifuge tube for use in endophyte analyses. The epiphyte wash solution was  
169 centrifuged at 4000 g for 20 minutes and the pellets were resuspended in MoBio PowerSoil C1  
170 solution, the first step in the DNA extraction process.

171  
172 After being washed to obtain epiphytes, a subset of samples collected at the third sampling  
173 timepoint were further surface cleaned with the goal of removing any leftover loosely associated  
174 fungi. This was done in an effort to obtain samples containing only endophytes, which we define  
175 here as being tightly associated to the outside or inside the tissue. Tissues were rinsed with  
176 autoclaved nanopure water (30 seconds), immersed in 95% ethanol (5 seconds), immersed in  
177 0.5% NaOCl (~10% bleach) (2 minutes), immersed in 70% ethanol (2 minutes), then rinsed with  
178 autoclaved nanopure water (1 minute) three times. Tissues were then placed into MoBio  
179 PowerSoil C1 solution and crushed using flame sterilized tweezers.

### 180 181 *Sequence generation*

182  
183 Using a random number generator, samples were randomly assigned places in 96-well plates and  
184 sent to Zymo Research, Inc for sequencing via their ZymoBIOMICS Service. We briefly  
185 summarize their protocol here. Fungal ITS2 amplicon sequencing was performed using the  
186 Quick NGS Library Preparation Kit (Zymo Research, Irvine, CA). The ITS2 region was  
187 amplified via PCR using the ITS5.8S\_Fun and ITS4\_Fun (McHugh and Schwartz, 2015; Taylor  
188 et al., 2016) primers which were chosen to try to minimize the amount of host plant  
189 amplification. Final PCR products were quantified with qPCR fluorescence readings and pooled  
190 together based on equal molarity. The final pooled library was cleaned up with Select-a-Size  
191 DNA Clean & Concentrator™ (Zymo Research, Irvine, CA), then quantified with TapeStation  
192 (Agilent, Santa Clara, CA) and Qubit (Invitrogen, Carlsbad, CA). The final library was  
193 sequenced on Illumina MiSeq (Illumina, Inc., San Diego, CA, USA) with a v3 reagent kit (600  
194 cycles) to generate 300 bp paired-end reads. The sequencing was performed with >10% PhiX  
195 spike-in. Sequence reads were demultiplexed by Zymo Research, Inc using the MiSeq Reporter.  
196 The raw sequence reads generated for this ITS amplicon project were deposited at GenBank  
197 under accession no. [PRJNA515720](https://doi.org/10.1093/bioinformatics/btj111).

### 198 199 *Sequence processing*

200

201 Primers were removed using `cutadapt` (v. 1.14) (Martin, 2011). Forward and reverse reads were  
202 then merged with `PEAR` (v. 0.9.5) (Zhang et al., 2014) using the script `run_pear.pl` (Comeau et  
203 al., 2017) which implements `PEAR` in parallel.

204

205 The resulting merged fastq files were analyzed in R (v. 3.5.1) using `dada2` (v. 1.10.0), `decontam`  
206 (v. 1.1.2), `phyloseq` (v. 1.26.0), `vegan` (v. 2.5.5), `FSA` (v. 0.8.25) and `ggplot2` (v. 3.1.0) (Callahan  
207 et al., 2016; Davis et al., 2018; Dixon, 2003; McMurdie and Holmes, 2013; Ogle, 2016; R Core  
208 Team, 2016; Wickham, 2009). For a detailed walkthrough of the following analysis using R, see  
209 the R-markdown summary file (File S1).

210

211 Prior to denoising, reads were truncated at the first quality score of 2 and reads with an expected  
212 error greater than 2 were removed. Since `PEAR` alters the quality scores during sequence  
213 merging, we inflated the error profile used by `dada2` to denoise sequences by a factor of 3. Reads  
214 were then denoised and merged using `dada2` to generate a table of amplicon sequence variants  
215 (ASVs). Chimeric sequences were identified using `removeBimeraDenovo` and removed prior to  
216 downstream analyses (~0.31% of sequences). Taxonomy was inferred using the RDP Naive  
217 Bayesian Classifier algorithm with a modified UNITE (v. 8.0) database resulting in 2953 ASVs  
218 (UNITE Community, 2019; Wang et al., 2007). The UNITE database was modified to include a  
219 representative ITS amplicon sequence for the host plant, *Zostera marina* (KM051458.1). ASVs  
220 were then named by giving each a unique number preceded by “SV” which stands for sequence  
221 variant (e.g. SV1, SV2, etc).

222

223 Subsequently, `ITS-x` (v. 1.1b) was run on the unique ASVs (Bengtsson-Palme et al., 2013). This  
224 program, which uses kingdom-specific hidden markov models to identify the ITS region of  
225 sequences, could not detect a fungal ITS region in 1064 of the ASVs. These ASVs were thus  
226 considered putively non-fungal and were removed from downstream analysis.

227

228 `Decontam`'s prevalence method was used to identify possible contaminants with a threshold of  
229 0.5 which will identify sequences that have a higher prevalence in negative controls than in true  
230 samples. This threshold identified 38 possible contaminants which were then removed from the  
231 dataset. Negative and positive controls were subsequently removed at this point in the analysis.  
232 Remaining ASVs assigned as non-fungal at the domain level (e.g. ASVs assigned to the host  
233 plant, *Z. marina*, or with no domain level classification) were removed from the dataset prior to  
234 downstream analysis resulting in a final table of 1850 ASVs. Four samples were represented by  
235 zero sequences after these filtering steps and were subsequently removed.

236

237 ***Sequence analysis and visualization***

238

239 For statistical analysis and visualization, the resulting data was then subset without replacement  
240 to an even number of sequences per sample depending on the comparisons being made. As a  
241 result, when investigating differences in epiphytes between bulk sample types a depth of 10,000  
242 sequences was selected resulting in the inclusion of 58 samples: leaf ( $n = 17$ ), root ( $n = 14$ ),  
243 rhizome ( $n = 7$ ) and sediment ( $n = 20$ ). When investigating differences across leaf length a  
244 number of 5,000 sequences was chosen resulting in the inclusion of 50 samples: leaf epiphytes ( $n$   
245  $= 25$ ) and leaf endophytes ( $n = 25$ ). These depths were selected after examining rarefaction  
246 curves to balance maximizing the number of sequences per sample while also minimizing the  
247 number of samples removed from downstream analysis.

248  
249 To assess within-sample (i.e., alpha) diversity, the observed number of ASVs and the Shannon  
250 index of samples were calculated using the `estimate_richness` function in `phyloseq`. Kruskal–  
251 Wallis tests with 9,999 permutations were used to test for significant differences in alpha  
252 diversity between bulk sample types (leaf, root, rhizome, sediment). For metrics in which the  
253 Kruskal–Wallis test resulted in a rejected null hypothesis ( $p < 0.05$ ), Bonferroni corrected post-  
254 hoc Dunn tests were performed.

255  
256 To assess between-sample (i.e., beta), diversity, Bray–Curtis (Bray et al., 1957) dissimilarities  
257 were calculated using the `ordinate` function in `phyloseq` and visualized using principal  
258 coordinates analysis. To test for significant differences in mean centroids between sample  
259 categories (e.g., sample type), permutational manovas (PERMANOVAs) were performed with  
260 9,999 permutations and to account for multiple comparisons, p-values were adjusted using the  
261 Bonferroni correction (Anderson, 2001). PERMANOVA tests are known to be sensitive to  
262 differences in dispersion when using abundance-based distance matrices like Bray-Curtis  
263 (Warton et al., 2012), but are still more robust than other tests (Anderson and Walsh, 2013). To  
264 control for this, we also tested for differences in mean dispersions between different sample  
265 categories using the `betadisper` and `permutest` functions from the `vegan` package in R with 9,999  
266 permutations. For `betadisper` results that resulted in a rejected null hypothesis ( $p < 0.05$ ), the  
267 post-hoc Tukey’s Honest Significant Difference (HSD) test was performed to identify which  
268 categories had mean dispersions that were significantly different.

269  
270 To compare fungal community composition, we collapsed ASVs into taxonomic orders using the  
271 `tax_glom` function in `phyloseq` and then removed orders with a variance of less than one percent  
272 when comparing between sample types and a variance of less than 0.1 percent when comparing  
273 across leaf lengths. The average relative abundance of taxonomic orders was compared between  
274 sample types using Bonferroni corrected Kruskal–Wallis tests in R. For orders where the  
275 Kruskal–Wallis test resulted in a rejected null hypothesis, Bonferroni corrected post-hoc Dunn  
276 tests were performed to identify which sample comparisons for each taxonomic order were  
277 significantly different.

278

279 To examine the contribution of specific ASVs to fungal community composition across leaf  
280 length, the dataset was filtered to include only ASVs with a mean abundance of greater than two  
281 percent. The resulting ASVs were then compared to each other and those that shared greater than  
282 99% sequence identity were grouped into what we refer to as “complexes”. Complexes were  
283 given a name based on the the most abundant ASV in the group (e.g. SV8 complex). The  
284 average relative abundance of ASVs and ASV complexes were compared between sample types  
285 using Bonferroni corrected Kruskal–Wallis tests in R. For ASVs and ASV complexes where the  
286 Kruskal–Wallis test resulted in a rejected null hypothesis, Bonferroni corrected post-hoc Dunn  
287 tests were performed to identify which sample comparisons for each ASV or ASV complex were  
288 significantly different.

289

### 290 *Sanger sequencing*

291

292 The most prevalent sequences associated with *Z. marina* leaf tissue all come from a single  
293 complex (i.e., they all share > 99% sequence identity). This complex, which includes SV8,  
294 SV11, SV16 and SV56, has been named the SV8 complex because SV8 is the most abundant  
295 member of this group. None of the ASVs in the SV8 complex could be classified into a fungal  
296 phylum using currently available databases. In order to attempt to improve taxonomic  
297 classification of the SV8 complex, we used PCR to obtain sequence data for part of the 28S  
298 rRNA gene from representatives of this complex found in our samples. To obtain this sequence,  
299 a SV8-specific primer (5'-GGAGCATGTCTGTTTGAGAA-3') was designed for the ITS2  
300 region using Primer-BLAST (Ye et al., 2012). This primer was then used in PCR along with the  
301 reverse fungal 28S rRNA gene primer, LR3 (Vilgalys and Hester, 1990). PCR using this pair of  
302 primers should at least in theory amplify the ITS2 and D1/D2 regions of the 28S rRNA gene for  
303 the SV8 complex.

304

305 Using these primers, we performed PCR on DNA from two leaf epiphyte samples (sample IDs:  
306 108A and 109A) using Taq DNA Polymerase (QIAGEN, Hilden, Germany) with the following  
307 conditions: 95°C for 5 minutes, 35 cycles at 94°C for 30 seconds, 52°C for 15 seconds, 72°C for  
308 1 minute, and a final extension at 72°C for 8 minutes (Kress and Erickson, 2012).

309

310 PCR products were purified using the Nucleospin Gel and PCR kit (QIAGEN, Hilden,  
311 Germany). The resulting amplicon was sequenced using the Sanger method by the College of  
312 Biological Sciences<sup>UC</sup> DNA Sequencing Facility (<http://dnaseq.ucdavis.edu/>). The resulting ABI  
313 files were viewed and a consensus sequence was produced using seqtrace following the Swabs to  
314 Genomes workflow (Dunitz et al., 2015). Consensus sequences for the PCR products were  
315 deposited to NCBI Genbank under accession no. [MK994004](#), [MK994005](#).

316

### 317 *Phylogenetic reconstruction*

318



319 Closely related sequences to the sequence from the PCR products above were identified using  
320 NCBI's Standard Nucleotide BLAST's megablast option with default settings. These results  
321 were then used to guide a literature search to identify additional sequences for inclusion during  
322 phylogenetic reconstruction (Table S4) (Hassett et al., 2017; Karpov et al., 2014; Rad-Menéndez  
323 et al., 2018; Simmons et al., 2009; Van den Wyngaert et al., 2018).

324  
325 A sequence alignments of all sequences listed in Table S4 was generated using MAFFT (v.  
326 7.402) (Katoh, 2002) with default parameters on the CIPRES Science Gateway web server  
327 (Miller et al., 2010). The alignment was trimmed using trimAl (v.1.2) with the -gappypout method  
328 (Capella-Gutiérrez et al., 2009). The resulting alignment included 22 sequences and 915  
329 alignment positions. JModelTest2 (v. 2.1.6) was run with default parameters on the CIPRES  
330 Science Gateway web server to select a best-fit model of nucleotide substitution for use in  
331 phylogenetic analyses (Darriba et al., 2012; Guindon and Gascuel, 2003). The best-fit model  
332 based on both the Akaike Information Criterion and Bayesian Information Criterion values was  
333 the GTR + G + I evolutionary model.

334  
335 Using the CIPRES Science Gateway web server, phylogenetic trees were inferred from the  
336 trimmed alignment using both Bayesian and maximum likelihood approaches and a GTR + G + I  
337 model. Bayesian phylogenetic inference was performed using MrBayes (v. 3.2.2) with four  
338 incrementally heated simultaneous Monte Carlo Markov Chains (MCMC) run over 40,000  
339 generations, which was the optimal number of generations required to achieve a stop value of  
340 0.01 or less for the convergence diagnostic (Huelsenbeck and Ronquist, 2001). The first 25% of  
341 trees generated were discarded as burn-in and for the remaining trees, a majority rule consensus  
342 tree was generated and used to calculate the Bayesian Posterior Probabilities. A maximum  
343 likelihood approach was undertaken using RAxML (v. 8) using the -autoMRE option which  
344 automatically determines the optimal number of bootstrap replicates (Stamatakis, 2014). The  
345 resulting phylogenies were then visualized with FigTree (v. 1.4.2) and annotated in Adobe  
346 Photoshop CS6 (Rambaut, 2009).

347

## 348 **Results**

349

### 350 ***Fungal alpha diversity differs between sample types***

351

352 Alpha diversity was significantly different between bulk sample types (K–W test;  $p < 0.01$ ,  
353 Figure S1, Table S5) for all diversity metrics. Post-hoc Dunn tests identified that the alpha  
354 diversity for bulk root and rhizome tissues was consistently lower than the alpha diversity of the  
355 sediment ( $p < 0.05$ , Table S6). This is consistent with previous sequence-based studies of  
356 seagrass associated fungi (Hurtado-McCormick et al., 2019). The alpha diversity of the *Z.*  
357 *marina* mycobiome was found to be much lower than that previously seen for the bacterial  
358 communities associated with *Z. marina* (Ettinger et al., 2017).

359

360 Alpha diversity was not significantly different between root epiphytes and endophytes for any  
361 metrics (K-W test,  $p > 0.05$ , Figure S2). However, alpha diversity was significantly different  
362 between leaf epiphytes and endophytes when using the Shannon diversity index which  
363 incorporates evenness (K-W test,  $p < 0.05$ ), but was not significantly different when looking at  
364 the number of observed ASVs ( $p > 0.05$ ).

365

### 366 ***Fungal community structure differs between and within plant parts***

367

368 Fungal community structure differed significantly between different bulk sample types  
369 (PERMANOVA,  $p < 0.001$ , Table S7, Figure S3). Subsequent pairwise PERMANOVA test  
370 results found that community structure was significantly different for all sample type  
371 comparisons ( $p < 0.05$ , Table S8) except sediment vs. roots and leaves vs. roots ( $p > 0.05$ ).

372

373 We note, however, that within group variance, also known as dispersion, also differed  
374 significantly between bulk sample types (betadisper,  $p < 0.01$ , Table S9), with rhizomes having  
375 more dispersion than sediment or roots (Tukey HSD,  $p < 0.01$ , Table S10). PERMANOVA  
376 results can be confounded by dispersion differences when not using a balanced design with equal  
377 sample numbers for categories being compared. In such instances, a significant PERMANOVA  
378 result is unable to distinguish between differences in mean dispersions and differences in mean  
379 centroids. Thus, these results must be interpreted with circumspection.

380

381 Fungal community structure also differed significantly between leaf epiphyte and endophyte  
382 communities (PERMANOVA,  $p < 0.001$ , Table S11, Figure 1) and between leaf length segments  
383 ( $p < 0.05$ ). Pair-wise PERMANOVA test results found that the first five inches of leaves had  
384 significantly different community structure from the last fifteen inches ( $p < 0.01$ , Table S12). No  
385 significant dispersion differences were detected between the community structure of epiphytes  
386 and endophytes (betadisper,  $p > 0.05$ , Table S13) and the differences in mean dispersions  
387 between leaf length segments was barely non-significant ( $p = 0.052$ ). The first five inches of  
388 leaves had dispersions that differed significantly from the last ten inches (Tukey HSD,  $p < 0.05$ ,  
389 Table S14).

390

### 391 ***Taxonomic composition of mycobiome***

392

393 The composition of the mycobiome of bulk samples types was generally comprised of members  
394 of the taxonomic orders *Pleosporales*, *Helotiales*, *Saccharomycetales*, *Coniochaetales*,  
395 *Glomeralles*, *Agaricales*, *Cystobasidiales* and *Malasseziales* (Table S15, Figure 2). However, we  
396 note that the mycobiome of seagrass tissues was dominated by ASVs that were unable to be  
397 classified to a specific fungal phylum using current databases.

398

399 The orders *Malasseziales* and *Agaricales* had mean relative abundances that were significantly  
400 different between sample types (K-W test,  $p < 0.05$ , Table S16). *Agaricales* was enriched in the  
401 sediment and rhizome tissues relative to roots (Dunn,  $p < 0.01$ , Table S17). While *Malasseziales*  
402 had higher mean relative abundance on the roots relative to the leaves and sediment ( $p < 0.01$ ).  
403

#### 404 ***Mycobiome variation in seagrass leaves***

405  
406 There were no taxonomic orders with a mean relative abundance that was significantly different  
407 between leaf segments (K-W test,  $p > 0.05$ , Table S18, Table S19, Figure 3). However given the  
408 relatively high abundance of ASVs that were unable to be assigned confidently to a fungal order,  
409 we investigated whether the mean relative abundance of specific ASVs varied across leaf  
410 segments (Table S20, Figure 4). We found that the ASV, SV12, had a significantly higher  
411 abundance in leaf segments further from the sediment (K-W test,  $p < 0.001$ , Table S21). This  
412 was further supported by post-hoc Dunn test results ( $p < 0.01$ , Table S22). Based on megablast  
413 searches at NCBI, SV12 most closely matches existing ITS2 data from fungal sequences  
414 identified as coming from Aphelidomycota. In addition, we were interested in if there were  
415 ASVs that had mean relative abundances that varied with epiphyte and endophyte status. We  
416 found that the SV8 complex was enriched in epiphyte washes relative to endophyte samples (K-  
417 W test,  $p < 0.01$ , Table S23, Figure S4).  
418

#### 419 ***Phylogenetic placement and identification of the SV8 complex***

420  
421 Given the high relative abundance of the SV8 complex in the leaves (Figure 4) and its variable  
422 status between epiphyte and endophyte samples, we sought to obtain the sequence of the 28S  
423 rRNA gene region for the organism matching this ASV. We designed a primer specific to the  
424 ITS2 ASV for the complex using the sequence of SV8 and used a universal fungal 28S rRNA  
425 gene primer to obtain a linked ITS2-28S rRNA gene sequence associated with this complex. The  
426 resulting ITS2 portion of the resulting PCR products align well with all ASVs from the SV8  
427 complex. Therefore, we believe the 28S rRNA gene sequences obtained accurately represent the  
428 flanking region to the taxonomic group represented by the SV8 complex. We then used these  
429 28S rRNA gene sequences to place the organism represented by this ASV complex into a  
430 phylogenetic context and assign it a taxonomic classification. This analysis revealed that the  
431 SV8 complex (and thus also all ASVs within this complex) groups within the order  
432 Lobulomycetales in the phylum Chytridiomycota (Figure 5). Specifically, the SV8 complex is  
433 nested within the recently defined Novel Clade SW-I (Van den Wyngaert et al., 2018) and is  
434 sister to several culture independent sequences obtained from the marine ecosystem (Hassett et  
435 al., 2017).  
436

#### 437 **Discussion**

438

439 Here we offer an in depth survey of the fungi associated with *Z. marina*. We observed that the  
440 mycobiome of *Z. marina* roots and rhizomes had lower alpha diversity than that of rhizosphere  
441 sediment and that generally the *Z. marina* mycobiome had relatively low species diversity. Low  
442 levels of fungal colonization as well as decreased alpha diversity compared to nearby sediment  
443 have previously been made in culture and clone based studies of seagrasses (Devarajan and  
444 Suryanarayanan, 2002; Ling et al., 2015; Sakayaroj et al., 2010; Shoemaker and Wyllie-  
445 Echeverria, 2013; Van den Wyngaert et al., 2018; Venkatachalam et al., 2015). Possible reasons  
446 for low abundance and/or infrequent colonization of fungi include indirect factors such as the  
447 high salinity and low oxygen levels that are reflective of the marine ecosystem (Nielsen et al.,  
448 1999) and direct factors such as seagrass-derived phenolic compounds which are known to act as  
449 antimicrobials (Zapata and McMillan, 1979). Additionally, seasonal differences in fungal  
450 colonization of seagrasses have been observed, adding an additional layer of complexity and thus  
451 making fungal diversity and abundance comparisons difficult (Mata and Cebrián, 2013).

452  
453 Previous sequence-based studies of seagrass associated fungi, observed high abundances of  
454 sequences classified as Pleosporales (Hurtado-McCormick et al., 2019) or Eurotiales  
455 (Wainwright et al., 2018), where as here the dominant community members appear to be from  
456 understudied lineages like the Chytridiomycota. Additionally, Hurtado-McCormick et al. found  
457 evidence of Glomeromycota (arbuscular mycorrhizal fungi) in their dataset, whereas we did not.  
458 Possible reasons for these different observations include that these studies sampled different  
459 seagrass species than we did, had different sampling schema and used different sequencing  
460 methods and primer sets. The use of different sequencing primers specifically has been found to  
461 have drastic effects on the results and conclusions of mycobiome studies (Frau et al., 2019).

462  
463 We did see evidence of known DSE associating with *Z. marina*, including members of the  
464 Pleosporales and Glomeralles, both of which include groups that are known to associate with  
465 terrestrial plants (Arnold et al., 2007). We found that the Glomeralles, particularly a  
466 *Colleotrichum* species (SV10), was abundant in the lower 10 inches of leaf tissue. DSE,  
467 particularly members of the Pleosporales, have previously been observed associating with  
468 seagrasses (Borovec and Vohník, 2018; Gnavi et al., 2014; Panno et al., 2013; Torta et al., 2015;  
469 Vohník et al., 2015, 2016, 2017, 2019). In the mediteranean seagrass, *Posidonea*, it has been  
470 observed that the abundance of the dominant root associated fungi, a Pleosporales species  
471 (*Posidoniomyces atricolor* gen. et sp. nov.), is associated with changes in root hair morphology  
472 and can form ecto-mycorrhizal-like structures suggesting a close seagrass-fungi symbiosis  
473 (Borovec and Vohník, 2018; Vohník et al., 2016, 2017, 2019).

474  
475 Although many of the ASVs observed here associated with *Z. marina* are still unidentified, we  
476 were able to phylogenetically place the SV8 complex in Novel Clade SW-I in the  
477 Lobulomycetales. Known members of Novel Clade SW-I are parasitic chytrids of freshwater  
478 algae and diatoms (Frenken et al., 2017; Rad-Menéndez et al., 2018; Van den Wyngaert et al.,

479 2018). It is possible that the SV8 complex's high relative abundance both on and in *Z. marina*  
480 leaves may indicate that it is directly infecting host plant tissues and suggests that seagrasses  
481 may provide a novel niche for marine chytrids. However, we note that there is another possible  
482 interpretation, which is that the SV8 complex is infecting algae or diatoms that are tightly  
483 associated with the leaves of *Z. marina* which are themselves a part of the larger *Z. marina*  
484 microbiome. This latter interpretation seems to be supported by the observation that the SV8  
485 complex has a higher mean relative abundance in epiphyte washes relative to endophyte washes.  
486 However, the closest cultivated relative of the SV8 complex forms sporangia outside of host  
487 cells (Van den Wyngaert et al., 2018) and thus, we might expect to find more zoospores in the  
488 epiphyte washes. Thus the higher relative abundance of the SV8 complex in the epiphyte washes  
489 is consistent with both explanations.

490  
491 Our observations here are not the first evidence of chytrid associations with seagrasses. A  
492 rhizomycelial chytrid was previously observed as the most abundant fungus associating with  
493 *Thalassia testudinum* leaves (Newell and Fell, 1980) and was hypothesized to be a possible  
494 symbiont, or weak parasite, of the leaves. In a later study, the authors looked for this same  
495 chytrid association in *Zostera* with little success (Newell, 1981). However the authors only  
496 looked at one location at one time and we note that the SV8 complex was not prevalent during  
497 our first two sampling time points. The high abundance of the SV8 complex during our third  
498 sampling time point may be because we observed it during a bloom event. Members of the  
499 Lobulomycetales have previously been seen to bloom in late summer, which is when we sampled  
500 (Frenken et al., 2017).

501  
502 Another ASV of interest, which was initially unable to be classified into a fungal phylum, is  
503 SV12, which most closely matches existing ITS2 data from fungal sequences in the  
504 Aphelidomycota. Known Aphelidomycota are intracellular parasites of green algae (Tedersoo et  
505 al., 2018). The increased relative abundance of SV12 in the endophyte samples relative to the  
506 epiphyte washes is consistent with the possibility that the SV12 containing organisms are  
507 directly infecting *Z. marina* leaf tissue. However, as with the SV8 complex, it is also possible  
508 that SV12 containing organisms could be associating with an algae that is itself tightly associated  
509 with *Z. marina* leaves.

510  
511 The prevalence of unclassifiable ASVs, many of which have closest matches in the  
512 Chytridiomycota and Aphelidomycota, with *Z. marina* makes sense given that these lineages  
513 have been previously observed to be the dominant fungal lineages in the marine and aquatic  
514 ecosystems (Comeau et al., 2016; Grossart et al., 2019; Picard, 2017; Richards et al., 2012, 2015;  
515 Rojas-Jimenez et al., 2019) and have life histories that include associations with green algae  
516 (Letcher et al., 2013; Picard et al., 2013; Tedersoo et al., 2018). Thus, it is likely that seagrasses,  
517 as marine plants, may be providing these fungal lineages with a new ecological niche.

518

## 519 **Conclusions**

520

521 We observed that *Z. marina* tissues harbor distinct fungal communities and present analyses and  
522 speculation regarding the identity and possible functional roles of these species. For example,  
523 we identified that the SV8 complex, which represents the most prevalent sequences associated  
524 with *Z. marina* leaf tissue, is nested within Novel Clade SW-I in the order Lobulomycetales and  
525 hypothesize that this chytrid may be directly infecting *Z. marina* leaf tissues. However, despite  
526 their abundance and possible importance, as evidenced by the number of novel fungal sequences  
527 observed here, we still know relatively little about the diversity and functional roles of marine fungi  
528 in the seagrass ecosystem. We propose that seagrass beds may be hotspots of marine fungal  
529 diversity, specifically the diversity of understudied lineages that are distantly related from well  
530 studied fungi (e.g. the Dikarya). Additionally, seagrasses may be an interesting model with  
531 which to look at terrestrial to marine transitions in the context of host-microbe interactions since  
532 their evolutionary history (coevolution from a terrestrial ancestor) mirrors the evolutionary  
533 history of many lineages of marine fungi, which are thought to have ancestors that secondarily  
534 returned to the marine environment multiple times (Jones et al., 2015; Schoch et al., 2009;  
535 Spatafora et al., 1998; Suetrong et al., 2009). This work helps lay a foundation for future  
536 seagrass-fungal studies and highlights a need for future studies focusing on marine fungi and the  
537 potential functional importance of these understudied communities to the larger seagrass  
538 ecosystem.

## 539 **Author Contributions**

540 Cassandra L. Ettinger conceived and designed the experiments, performed sampling, analyzed  
541 the data, prepared figures and/or tables, wrote and reviewed drafts of the paper.

542 Jonathan A. Eisen advised on data analysis, edited and reviewed drafts of the paper.

## 543 **DNA Deposition**

544 This ITS amplicon sequencing project has been deposited at GenBank under accession no.  
545 [PRJNA515720](#) and consensus sequences for the SV8 complex were deposited under accession  
546 no. [MK994004](#), [MK994005](#).

## 547 **Acknowledgements**

548 We would like to thank Katherine Dynarski (ORCID: [0000-0001-5101-9666](#)) and Sonia Ghose  
549 (ORCID: [0000-0001-5667-6876](#)) for help with sample collection. We would like to thank John J.  
550 Stachowicz for use of his scientific sampling permit, California Department of Fish and Wildlife  
551 Scientific Collecting Permit # SC 4874.

552

## 553 **Funding sources**

554 This work was supported by grants from the University of California Natural Reserve System  
555 and the UC Davis Center for Population Biology to CLE. The funders had no role in study  
556 design, data collection and analysis, decision to publish, or preparation of the manuscript.

557

## 558 COI

559 Jonathan A. Eisen is on the Scientific Advisory Board of Zymo Research, Inc and a discount was  
560 received for the sequencing services provided.

561

## 562 References

563 Amend, A., Burgaud, G., Cunliffe, M., Edgcomb, V. P., Ettinger, C. L., Gutiérrez, M. H., et al.  
564 (2019). Fungi in the Marine Environment: Open Questions and Unsolved Problems. *MBio*  
565 10. doi:10.1128/mBio.01189-18.

566 Anderson, M. J. (2001). A new method for non-parametric multivariate analysis of variance.  
567 *Austral Ecology* 26, 32–46. doi:10.1111/j.1442-9993.2001.01070.pp.x.

568 Anderson, M. J., and Walsh, D. C. I. (2013). PERMANOVA, ANOSIM, and the Mantel test in  
569 the face of heterogeneous dispersions: What null hypothesis are you testing? *Ecological*  
570 *Monographs* 83, 557–574. doi:10.1890/12-2010.1.

571 Arnold, A. E., Henk, D. A., Eells, R. L., Lutzoni, F., and Vilgalys, R. (2007). Diversity and  
572 phylogenetic affinities of foliar fungal endophytes in loblolly pine inferred by culturing and  
573 environmental PCR. *Mycologia* 99, 185–206.

574 Beck-Nielsen, D., and Madsen, T. V. (2001). Occurrence of vesicular–arbuscular mycorrhiza in  
575 aquatic macrophytes from lakes and streams. *Aquatic Botany* 71, 141–148.  
576 doi:10.1016/s0304-3770(01)00180-2.

577 Bengtsson-Palme, J., Ryberg, M., Hartmann, M., Branco, S., Wang, Z., Godhe, A., et al. (2013).  
578 Improved software detection and extraction of ITS1 and ITS2 from ribosomal ITS  
579 sequences of fungi and other eukaryotes for analysis of environmental sequencing data.  
580 *Methods in Ecology and Evolution*. doi:10.1111/2041-210x.12073.

581 Bohrer, K. E., Friese, C. F., and Amon, J. P. (2004). Seasonal dynamics of arbuscular  
582 mycorrhizal fungi in differing wetland habitats. *Mycorrhiza* 14, 329–337.  
583 doi:10.1007/s00572-004-0292-7.

584 Bonfante, P., and Anca, I.-A. (2009). Plants, mycorrhizal fungi, and bacteria: a network of  
585 interactions. *Annu. Rev. Microbiol.* 63, 363–383.

586 Borovec, O., and Vohník, M. (2018). Ontogenetic transition from specialized root hairs to  
587 specific root–fungus symbiosis in the dominant Mediterranean seagrass *Posidonia oceanica*.  
588 *Sci. Rep.* 8, 10773.

589 Bray, J. R., Roger Bray, J., and Curtis, J. T. (1957). An Ordination of the Upland Forest  
590 Communities of Southern Wisconsin. *Ecological Monographs* 27, 325–349.

- 591       doi:10.2307/1942268.
- 592       Brundrett, M. C. (2002). Coevolution of roots and mycorrhizas of land plants. *New Phytologist*  
593       154, 275–304. doi:10.1046/j.1469-8137.2002.00397.x.
- 594       Brundrett, M. C. (2009). Mycorrhizal associations and other means of nutrition of vascular  
595       plants: understanding the global diversity of host plants by resolving conflicting information  
596       and developing reliable means of diagnosis. *Plant and Soil* 320, 37–77. doi:10.1007/s11104-  
597       008-9877-9.
- 598       Callahan, B. J., McMurdie, P. J., Rosen, M. J., Han, A. W., Johnson, A. J. A., and Holmes, S. P.  
599       (2016). DADA2: High-resolution sample inference from Illumina amplicon data. *Nat.*  
600       *Methods* 13, 581–583.
- 601       Capella-Gutiérrez, S., Silla-Martínez, J. M., and Gabaldón, T. (2009). trimAl: a tool for  
602       automated alignment trimming in large-scale phylogenetic analyses. *Bioinformatics* 25,  
603       1972–1973.
- 604       Clayton, J. S., and Bagyaraj, D. J. (1984). Vesicular-arbuscular mycorrhizas in submerged  
605       aquatic plants of New Zealand. *Aquatic Botany* 19, 251–262. doi:10.1016/0304-  
606       3770(84)90043-3.
- 607       Comeau, A. M., Douglas, G. M., and Langille, M. G. I. (2017). Microbiome Helper: a Custom  
608       and Streamlined Workflow for Microbiome Research. *mSystems* 2.  
609       doi:10.1128/msystems.00127-16.
- 610       Comeau, A. M., Vincent, W. F., Bernier, L., and Lovejoy, C. (2016). Novel chytrid lineages  
611       dominate fungal sequences in diverse marine and freshwater habitats. *Sci. Rep.* 6, 30120.
- 612       Costanza, R., d’Arge, R., de Groot, R., Farber, S., Grasso, M., Hannon, B., et al. (1997). The  
613       value of the world’s ecosystem services and natural capital. *Nature* 387, 253–260.  
614       doi:10.1038/387253a0.
- 615       Cuomo, V., Vanzanella, F., Fresi, E., Cinelli, F., and Mazzella, L. (1985). Fungal flora of  
616       Posidonia oceanica and its ecological significance. *Transactions of the British Mycological*  
617       *Society* 84, 35–40. doi:10.1016/s0007-1536(85)80217-5.
- 618       Darriba, D., Taboada, G. L., Doallo, R., and Posada, D. (2012). jModelTest 2: more models, new  
619       heuristics and parallel computing. *Nat. Methods* 9, 772.
- 620       Davis, N. M., Proctor, D. M., Holmes, S. P., Relman, D. A., and Callahan, B. J. (2018). Simple  
621       statistical identification and removal of contaminant sequences in marker-gene and  
622       metagenomics data. *Microbiome* 6, 226.
- 623       Devarajan, P. T., and Suryanarayanan, T. (2002). Endophytic fungi associated with the tropical  
624       seagrass *Halophila ovalis* (Hydrocharitaceae). *Indian J. Mar. Sci.* 31, 73–74.
- 625       Dixon, P. (2003). VEGAN, a package of R functions for community ecology. *Journal of*  
626       *Vegetation Science* 14, 927. doi:10.1658/1100-9233(2003)014[0927:vaporf]2.0.co;2.



- 627 Dunitz, M. I., Lang, J. M., Jospin, G., Darling, A. E., Eisen, J. A., and Coil, D. A. (2015). Swabs  
628 to genomes: a comprehensive workflow. *PeerJ* 3, e960. doi:10.7717/peerj.960.
- 629 Ettinger, C. L., Voerman, S. E., Lang, J. M., Stachowicz, J. J., and Eisen, J. A. (2017). Microbial  
630 communities in sediment from patches, but not the leaf or root microbiomes, vary in relation  
631 to distance from patch edge. *PeerJ* 5, e3246.
- 632 Frau, A., Kenny, J. G., Lenzi, L., Campbell, B. J., Ijaz, U. Z., Duckworth, C. A., et al. (2019).  
633 DNA extraction and amplicon production strategies deeply influence the outcome of gut  
634 mycobiome studies. *Sci. Rep.* 9, 9328.
- 635 Frenken, T., Alacid, E., Berger, S. A., Bourne, E. C., Gerphagnon, M., Grossart, H.-P., et al.  
636 (2017). Integrating chytrid fungal parasites into plankton ecology: research gaps and needs.  
637 *Environ. Microbiol.* 19, 3802–3822.
- 638 Gnani, G., Ercole, E., Panno, L., Vizzini, A., and Varese, G. C. (2014). Dothideomycetes and  
639 Leotiomyces sterile mycelia isolated from the Italian seagrass *Posidonia oceanica* based on  
640 rDNA data. *Springerplus* 3, 508.
- 641 Grossart, H.-P., Van den Wyngaert, S., Kagami, M., Wurzbacher, C., Cunliffe, M., and Rojas-  
642 Jimenez, K. (2019). Fungi in aquatic ecosystems. *Nat. Rev. Microbiol.* 17, 339–354.
- 643 Guindon, S., and Gascuel, O. (2003). A simple, fast, and accurate algorithm to estimate large  
644 phylogenies by maximum likelihood. *Syst. Biol.* 52, 696–704.
- 645 Hassett, B. T., Ducluzeau, A.-L. L., Collins, R. E., and Gradinger, R. (2017). Spatial distribution  
646 of aquatic marine fungi across the western Arctic and sub-arctic. *Environ. Microbiol.* 19,  
647 475–484.
- 648 Huelsenbeck, J. P., and Ronquist, F. (2001). MRBAYES: Bayesian inference of phylogenetic  
649 trees. *Bioinformatics* 17, 754–755. doi:10.1093/bioinformatics/17.8.754.
- 650 Humphreys, C. P., Franks, P. J., Rees, M., Bidartondo, M. I., Leake, J. R., and Beerling, D. J.  
651 (2010). Mutualistic mycorrhiza-like symbiosis in the most ancient group of land plants. *Nat.*  
652 *Commun.* 1, 103.
- 653 Hurtado-McCormick, V., Kahlke, T., Petrou, K., Jeffries, T., Ralph, P. J., and Seymour, J. R.  
654 (2019). Regional and Microenvironmental Scale Characterization of the *Zostera muelleri*  
655 Seagrass Microbiome. *Frontiers in Microbiology* 10. doi:10.3389/fmicb.2019.01011.
- 656 Jones, E. B. G., and Gareth Jones, E. B. (2011). Are there more marine fungi to be described?  
657 *Botanica Marina* 54. doi:10.1515/bot.2011.043.
- 658 Jones, E. B. G., Gareth Jones, E. B., Suetrong, S., Sakayaroj, J., Bahkali, A. H., Abdel-Wahab,  
659 M. A., et al. (2015). Classification of marine Ascomycota, Basidiomycota,  
660 Blastocladiomycota and Chytridiomycota. *Fungal Diversity* 73, 1–72. doi:10.1007/s13225-  
661 015-0339-4.
- 662 Kadivar, H., and Stapleton, A. E. (2003). Ultraviolet radiation alters maize phyllosphere bacterial

- 663 diversity. *Microb. Ecol.* 45, 353–361.
- 664 Karpov, S. A., Kobseva, A. A., Mamkaeva, M. A., Mamkaeva, K. A., Mikhailov, K. V.,  
665 Mirzaeva, G. S., et al. (2014). Gromochytrium mamkaevae gen. & sp. nov. and two new  
666 orders: Gromochytriales and Mesochytriales (Chytridiomycetes). *Persoonia - Molecular*  
667 *Phylogeny and Evolution of Fungi* 32, 115–126. doi:10.3767/003158514x680234.
- 668 Katoh, K. (2002). MAFFT: a novel method for rapid multiple sequence alignment based on fast  
669 Fourier transform. *Nucleic Acids Research* 30, 3059–3066. doi:10.1093/nar/gkf436.
- 670 Kembel, S. W., O'Connor, T. K., Arnold, H. K., Hubbell, S. P., Wright, S. J., and Green, J. L.  
671 (2014). Relationships between phyllosphere bacterial communities and plant functional  
672 traits in a neotropical forest. *Proc. Natl. Acad. Sci. U. S. A.* 111, 13715–13720.
- 673 Khan, A. G., and Belik, M. (1995). Occurrence and Ecological Significance of Mycorrhizal  
674 Symbiosis in Aquatic Plants. *Mycorrhiza*, 627–666. doi:10.1007/978-3-662-08897-5\_27.
- 675 Kirichuk, N. N., and Pivkin, M. V. (2015). Filamentous fungi associated with the seagrass  
676 *Zostera marina* Linnaeus, 1753 of Rifovaya Bay (Peter the Great Bay, the Sea of Japan).  
677 *Russian Journal of Marine Biology* 41, 351–355. doi:10.1134/s1063074015050053.
- 678 Kohout, P., Sýkorová, Z., Čtvrtlíková, M., Rydlová, J., Suda, J., Vohník, M., et al. (2012).  
679 Surprising spectra of root-associated fungi in submerged aquatic plants. *FEMS*  
680 *Microbiology Ecology* 80, 216–235. doi:10.1111/j.1574-6941.2011.01291.x.
- 681 Kress, W. J., and Erickson, D. L. (2012). DNA Barcodes: Methods and Protocols.  
682 doi:10.1007/978-1-61779-591-6\_1.
- 683 Kuo, J. (1984). Structural aspects of apoplast fungal hyphae in a marine angiosperm, *Zostera*  
684 *muelleri* Irmisch ex Aschers. (Zosteraceae). *Protoplasma* 121, 1–7.  
685 doi:10.1007/bf01279746.
- 686 Les, D. H., Cleland, M. A., and Waycott, M. (1997). Phylogenetic Studies in Alismatidae, II:  
687 Evolution of Marine Angiosperms (Seagrasses) and Hydrophily. *Systematic Botany* 22, 443.  
688 doi:10.2307/2419820.
- 689 Letcher, P. M., Lopez, S., Schmieder, R., Lee, P. A., Behnke, C., Powell, M. J., et al. (2013).  
690 Characterization of Amoebophilium protococcarum, an algal parasite new to the  
691 cryptomycota isolated from an outdoor algal pond used for the production of biofuel. *PLoS*  
692 *One* 8, e56232.
- 693 Ling, J., Zhang, Y., Wu, M., Wang, Y., Dong, J., Jiang, Y., et al. (2015). Fungal Community  
694 Successions in Rhizosphere Sediment of Seagrasses *Enhalus acoroides* under PAHs Stress.  
695 *International Journal of Molecular Sciences* 16, 14039–14055. doi:10.3390/ijms160614039.
- 696 Martin, M. (2011). Cutadapt removes adapter sequences from high-throughput sequencing reads.  
697 *EMBnet.journal* 17, 10. doi:10.14806/ej.17.1.200.
- 698 Mata, J. L., and Cebrián, J. (2013). Fungal endophytes of the seagrasses *Halodule wrightii* and

- 699 Thalassia testudinum in the north-central Gulf of Mexico. *Botanica Marina* 56.  
700 doi:10.1515/bot-2013-0047.
- 701 McHugh, T. A., and Schwartz, E. (2015). Changes in plant community composition and reduced  
702 precipitation have limited effects on the structure of soil bacterial and fungal communities  
703 present in a semiarid grassland. *Plant and Soil* 388, 175–186. doi:10.1007/s11104-014-  
704 2269-4.
- 705 McMurdie, P. J., and Holmes, S. (2013). phyloseq: an R package for reproducible interactive  
706 analysis and graphics of microbiome census data. *PLoS One* 8, e61217.
- 707 Miller, M. A., Pfeiffer, W., and Schwartz, T. (2010). Creating the CIPRES Science Gateway for  
708 inference of large phylogenetic trees. *2010 Gateway Computing Environments Workshop*  
709 (*GCE*). doi:10.1109/gce.2010.5676129.
- 710 Newell, S. (1981). Fungi and Bacteria in or on Leaves of Eelgrass ( *Zostera marina* L .) from  
711 Chesapeake Bay. *Appl. Environ. Microbiol.*
- 712 Newell, S., and Fell, J. (1980). Mycoflora of turtlegrass (*Thalassia testudinum* König) as  
713 recorded after seawater incubation. *Botanica marina* 23.
- 714 Nielsen, S. L., Thingstrup, I., and Wigand, C. (1999). Apparent lack of vesicular–arbuscular  
715 mycorrhiza (VAM) in the seagrasses *Zostera marina* L. and *Thalassia testudinum* Banks ex  
716 König. *Aquatic Botany* 63, 261–266. doi:10.1016/s0304-3770(98)00123-5.
- 717 Ogle, D. H. (2016). *FSA: fisheries stock analysis*.
- 718 Orth, R. J., Carruthers, T. J. B., Dennison, W. C., Duarte, C. M., Fourqurean, J. W., Heck, K. L.,  
719 et al. (2006). A Global Crisis for Seagrass Ecosystems. *BioScience* 56, 987.  
720 doi:10.1641/0006-3568(2006)56[987:agcfse]2.0.co;2.
- 721 Panno, L., Bruno, M., Voyron, S., Anastasi, A., Gnani, G., Miserere, L., et al. (2013). Diversity,  
722 ecological role and potential biotechnological applications of marine fungi associated to the  
723 seagrass *Posidonia oceanica*. *N. Biotechnol.* 30, 685–694.
- 724 Phongpaichit, S., and Supaphon, P. (2014). Diversity and antimicrobial activity of endophytic  
725 fungi isolated from the seagrass *Enhalus acoroides*. *IJMS*.
- 726 Picard, K. T. (2017). Coastal marine habitats harbor novel early-diverging fungal diversity.  
727 *Fungal Ecology* 25, 1–13. doi:10.1016/j.funeco.2016.10.006.
- 728 Picard, K. T., Letcher, P. M., and Powell, M. J. (2013). Evidence for a facultative mutualist  
729 nutritional relationship between the green coccoid alga *Bracteacoccus* sp. (Chlorophyceae)  
730 and the zoosporic fungus *Rhizidium phycophilum* (Chytridiomycota). *Fungal Biol.* 117,  
731 319–328.
- 732 Porras-Alfaro, A., and Bayman, P. (2011). Hidden fungi, emergent properties: endophytes and  
733 microbiomes. *Annu. Rev. Phytopathol.* 49, 291–315.

- 734 Radhika, K. P., and Rodrigues, B. F. (2007). Arbuscular Mycorrhizae in association with aquatic  
735 and marshy plant species in Goa, India. *Aquatic Botany* 86, 291–294.  
736 doi:10.1016/j.aquabot.2006.10.009.
- 737 Rad-Menéndez, C., Gerphagnon, M., Garvetto, A., Arce, P., Badis, Y., Sime-Ngando, T., et al.  
738 (2018). Rediscovering Zygorhizidium affluens Canter: Molecular Taxonomy, Infectious  
739 Cycle, and Cryopreservation of a Chytrid Infecting the Bloom-Forming Diatom Asterionella  
740 formosa. *Appl. Environ. Microbiol.* 84. doi:10.1128/AEM.01826-18.
- 741 Rambaut, A. (2009). *FigTree, version 1.4.2*. Available at:  
742 <http://tree.bio.ed.ac.uk/software/figtree/>.
- 743 R Core Team (2016). *R: a language and environment for statistical computing*.
- 744 Redecker, D., Kodner, R., and Graham, L. E. (2000). Glomalean fungi from the Ordovician.  
745 *Science* 289, 1920–1921.
- 746 Richards, T. A., Jones, M. D. M., Leonard, G., and Bass, D. (2012). Marine Fungi: Their  
747 Ecology and Molecular Diversity. *Annual Review of Marine Science* 4, 495–522.  
748 doi:10.1146/annurev-marine-120710-100802.
- 749 Richards, T. A., Leonard, G., Mahé, F., Del Campo, J., Romac, S., Jones, M. D. M., et al. (2015).  
750 Molecular diversity and distribution of marine fungi across 130 European environmental  
751 samples. *Proc. Biol. Sci.* 282. doi:10.1098/rspb.2015.2243.
- 752 Rojas-Jimenez, K., Rieck, A., Wurzbacher, C., Jürgens, K., Labrenz, M., and Grossart, H.-P.  
753 (2019). A Salinity Threshold Separating Fungal Communities in the Baltic Sea. *Front.*  
754 *Microbiol.* 10, 680.
- 755 Sakayaroj, J., Preedanon, S., Supaphon, O., Jones, E. B. G., and Phongpaichit, S. (2010).  
756 Phylogenetic diversity of endophyte assemblages associated with the tropical seagrass  
757 *Enhalus acoroides* in Thailand. *Fungal Diversity* 42, 27–45. doi:10.1007/s13225-009-0013-  
758 9.
- 759 Schoch, C. L., Crous, P. W., Groenewald, J. Z., Boehm, E. W. A., Burgess, T. I., de Gruyter, J.,  
760 et al. (2009). A class-wide phylogenetic assessment of Dothideomycetes. *Stud. Mycol.* 64,  
761 1–15S10.
- 762 Shoemaker, G., and Wyllie-Echeverria, S. (2013). Occurrence of rhizomal endophytes in three  
763 temperate northeast pacific seagrasses. *Aquatic Botany* 111, 71–73.  
764 doi:10.1016/j.aquabot.2013.05.010.
- 765 Simmons, D. R., James, T. Y., Meyer, A. F., and Longcore, J. E. (2009). Lobulomycetales, a  
766 new order in the Chytridiomycota. *Mycol. Res.* 113, 450–460.
- 767 Spatafora, J. W., Volkmann-Kohlmeyer, B., and Kohlmeyer, J. (1998). Independent terrestrial  
768 origins of the Halosphaeriales (marine Ascomycota). *Am. J. Bot.* 85, 1569–1580.
- 769 Šraj-Kržič, N., Pongrac, P., Klemenc, M., Kladnik, A., Regvar, M., and Gaberščik, A. (2006).

- 770 Mycorrhizal colonisation in plants from intermittent aquatic habitats. *Aquatic Botany* 85,  
771 331–336. doi:10.1016/j.aquabot.2006.07.001.
- 772 Stamatakis, A. (2014). RAxML version 8: a tool for phylogenetic analysis and post-analysis of  
773 large phylogenies. *Bioinformatics* 30, 1312–1313.
- 774 Suetrong, S., Schoch, C. L., Spatafora, J. W., Kohlmeyer, J., Volkmann-Kohlmeyer, B.,  
775 Sakayaroj, J., et al. (2009). Molecular systematics of the marine Dothideomycetes. *Stud.*  
776 *Mycol.* 64, 155–173S6.
- 777 Supaphon, P., Phongpaichit, S., Rukachaisirikul, V., and Sakayaroj, J. (2013). Antimicrobial  
778 potential of endophytic fungi derived from three seagrass species: *Cymodocea serrulata*,  
779 *Halophila ovalis* and *Thalassia hemprichii*. *PLoS One* 8, e72520.
- 780 Supaphon, P., Phongpaichit, S., Sakayaroj, J., Rukachaisirikul, V., Kobmoo, N., and Spatafora, J.  
781 W. (2017). Phylogenetic community structure of fungal endophytes in seagrass species.  
782 *Botanica Marina* 60. doi:10.1515/bot-2016-0089.
- 783 Taylor, D. L., Walters, W. A., Lennon, N. J., Bochicchio, J., Krohn, A., Caporaso, J. G., et al.  
784 (2016). Accurate Estimation of Fungal Diversity and Abundance through Improved  
785 Lineage-Specific Primers Optimized for Illumina Amplicon Sequencing. *Appl. Environ.*  
786 *Microbiol.* 82, 7217–7226.
- 787 Tedersoo, L., Sánchez-Ramírez, S., Kõljalg, U., Bahram, M., Döring, M., Schigel, D., et al.  
788 (2018). High-level classification of the Fungi and a tool for evolutionary ecological  
789 analyses. *Fungal Diversity* 90, 135–159. doi:10.1007/s13225-018-0401-0.
- 790 Torta, L., Lo Piccolo, S., Piazza, G., Burruano, S., Colombo, P., Ottonello, D., et al. (2015).  
791 *Lulwoanasp.*, a dark septate endophyte in roots of *Posidonia oceanica*(L.) Delile seagrass.  
792 *Plant Biology* 17, 505–511. doi:10.1111/plb.12246.
- 793 UNITE Community (2019). UNITE general FASTA release for Fungi 2. Version 18.11.2018.  
794 doi:10.15156/BIO/786353.
- 795 Usuki, F., and Narisawa, K. (2007). A mutualistic symbiosis between a dark septate endophytic  
796 fungus, *Heteroconium chaetospora*, and a nonmycorrhizal plant, Chinese cabbage.  
797 *Mycologia* 99, 175–184. doi:10.3852/mycologia.99.2.175.
- 798 Van den Wyngaert, S., Rojas-Jimenez, K., Seto, K., Kagami, M., and Grossart, H.-P. (2018).  
799 Diversity and Hidden Host Specificity of Chytrids Infecting Colonial Volvocacean Algae. *J.*  
800 *Eukaryot. Microbiol.* 65, 870–881.
- 801 Venkatachalam, A. (2015). Endophytic fungi of marine algae and seagrasses: a novel source of  
802 chitin modifying enzymes. *Mycosphere* 6, 345–355. doi:10.5943/mycosphere/6/3/10.
- 803 Venkatachalam, A., Thirunavukkarasu, N., and Suryanarayanan, T. S. (2015). Distribution and  
804 diversity of endophytes in seagrasses. *Fungal Ecology* 13, 60–65.  
805 doi:10.1016/j.funeco.2014.07.003.

- 806 Vilgalys, R., and Hester, M. (1990). Rapid genetic identification and mapping of enzymatically  
807 amplified ribosomal DNA from several *Cryptococcus* species. *J. Bacteriol.* 172, 4238–4246.
- 808 Vohník, M., Borovec, O., and Kolařík, M. (2016). Communities of Cultivable Root Mycobionts  
809 of the Seagrass *Posidonia oceanica* in the Northwest Mediterranean Sea Are Dominated by a  
810 Hitherto Undescribed Pleosporalean Dark Septate Endophyte. *Microbial Ecology* 71, 442–  
811 451. doi:10.1007/s00248-015-0640-5.
- 812 Vohník, M., Borovec, O., Kolaříková, Z., Sudová, R., and Réblová, M. (2019). Extensive  
813 sampling and high-throughput sequencing reveal gen. et sp. nov. (Aigialaceae, Pleosporales)  
814 as the dominant root mycobiont of the dominant Mediterranean seagrass. *MycKeys* 55, 59–  
815 86.
- 816 Vohník, M., Borovec, O., Župan, I., Kolařík, M., and Sudová, R. (2017). Fungal root symbionts  
817 of the seagrass *Posidonia oceanica* in the central Adriatic Sea revealed by microscopy,  
818 culturing and 454-pyrosequencing. *Marine Ecology Progress Series* 583, 107–120.  
819 doi:10.3354/meps12337.
- 820 Vohník, M., Borovec, O., Župan, I., Vondrášek, D., Petrtýl, M., and Sudová, R. (2015).  
821 Anatomically and morphologically unique dark septate endophytic association in the roots  
822 of the Mediterranean endemic seagrass *Posidonia oceanica*. *Mycorrhiza* 25, 663–672.
- 823 Wainwright, B. J., Zahn, G. L., Arlyza, I. S., and Amend, A. S. (2018). Seagrass-associated  
824 fungal communities follow Wallace’s line, but host genotype does not structure fungal  
825 community. *Journal of Biogeography* 45, 762–770. doi:10.1111/jbi.13168.
- 826 Wang, B., and Qiu, Y.-L. (2006). Phylogenetic distribution and evolution of mycorrhizas in land  
827 plants. *Mycorrhiza* 16, 299–363.
- 828 Wang, B., Yeun, L. H., Xue, J.-Y., Liu, Y., Ané, J.-M., and Qiu, Y.-L. (2010). Presence of three  
829 mycorrhizal genes in the common ancestor of land plants suggests a key role of mycorrhizas  
830 in the colonization of land by plants. *New Phytologist* 186, 514–525. doi:10.1111/j.1469-  
831 8137.2009.03137.x.
- 832 Wang, Q., Garrity, G. M., Tiedje, J. M., and Cole, J. R. (2007). Naive Bayesian classifier for  
833 rapid assignment of rRNA sequences into the new bacterial taxonomy. *Appl. Environ.*  
834 *Microbiol.* 73, 5261–5267.
- 835 Warton, D. I., Wright, S. T., and Wang, Y. (2012). Distance-based multivariate analyses  
836 confound location and dispersion effects. *Methods in Ecology and Evolution* 3, 89–101.  
837 doi:10.1111/j.2041-210x.2011.00127.x.
- 838 Wickham, H. (2009). *ggplot2: Elegant Graphics for Data Analysis*. Springer Science & Business  
839 Media.
- 840 Wigand, C., and Court Stevenson, J. (1994). The Presence and Possible Ecological Significance  
841 of Mycorrhizae of the Submersed Macrophyte, *Vallisneria spiralis*. *Estuaries* 17, 206.  
842 doi:10.2307/1352570.

843 Wissler, L., Codoñer, F. M., Gu, J., Reusch, T. B. H., Olsen, J. L., Procaccini, G., et al. (2011).  
844 Back to the sea twice: identifying candidate plant genes for molecular evolution to marine  
845 life. *BMC Evol. Biol.* 11, 8.

846 Ye, J., Coulouris, G., Zaretskaya, I., Cutcutache, I., Rozen, S., and Madden, T. L. (2012).  
847 Primer-BLAST: a tool to design target-specific primers for polymerase chain reaction. *BMC*  
848 *Bioinformatics* 13, 134.

849 Zapata, O., and McMillan, C. (1979). Phenolic acids in seagrasses. *Aquatic Botany* 7, 307–317.  
850 doi:10.1016/0304-3770(79)90032-9.

851 Zhang, J., Kobert, K., Flouri, T., and Stamatakis, A. (2014). PEAR: a fast and accurate Illumina  
852 Paired-End reAd mergeR. *Bioinformatics* 30, 614–620.

853  
854  
855  
856  
857  
858  
859  
860  
861  
862  
863  
864  
865  
866  
867  
868  
869  
870  
871  
872  
873  
874  
875  
876  
877  
878  
879  
880  
881

882 **Figures**

883

884 **Figure 1: Leaf fungal community structure varies between epiphytes and endophytes.**

885 Principal Coordinates Analysis (PCoA) visualization of Bray-Curtis dissimilarities of fungal  
886 communities associated with leaves. Points in the ordination are colored and represented by  
887 shapes based on epiphyte (blue triangles; n = 25) or endophyte (green circles; n = 25) status. The  
888 dataset was first subset to a depth of 5,000 ITS2 amplicon sequences per sample and then Bray-  
889 Curtis dissimilarities were calculated using the ordinate function in phyloseq (McMurdie and  
890 Holmes, 2013).

891

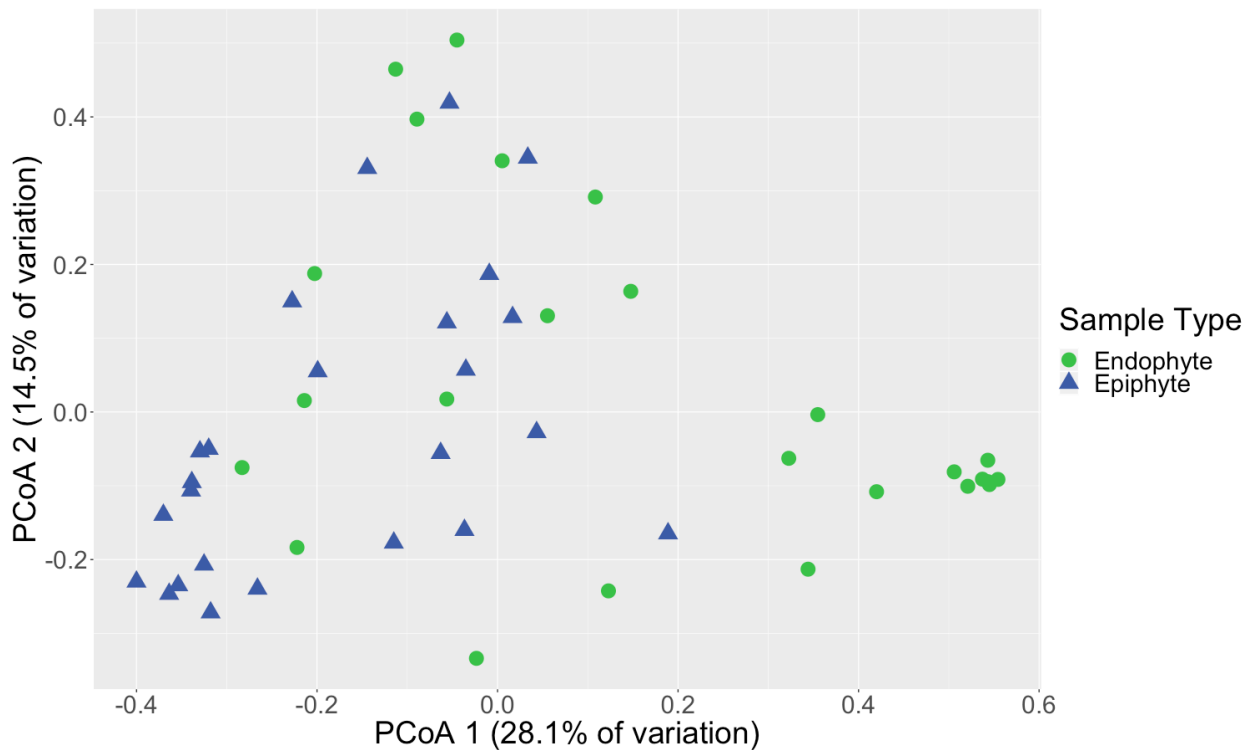

892

893

894

895

896

897

898

899

900

901

902

903

904

905



906 **Figure 2: Fungal community composition differs between tissue types.**

907 The mean relative abundance of taxonomic orders with a variance of greater than one percent are  
908 shown across bulk samples types, leaf (n = 17), root (n = 14), rhizome (n = 7) and sediment (n =  
909 20), with the standard error of the mean represented by error bars and bars colored by taxonomic  
910 phylum. The dataset was first subset to a depth of 10,000 sequences per sample, collapsed at the  
911 order level using the tax\_glom function in phyloseq (McMurdie and Holmes, 2013) and then  
912 converted into relative abundance values. Taxonomy was inferred for ITS2 amplicon sequence  
913 variants using the RDP Naive Bayesian Classifier algorithm with a modified UNITE (v. 8.0)  
914 database (UNITE Community, 2019; Wang et al., 2007).  
915

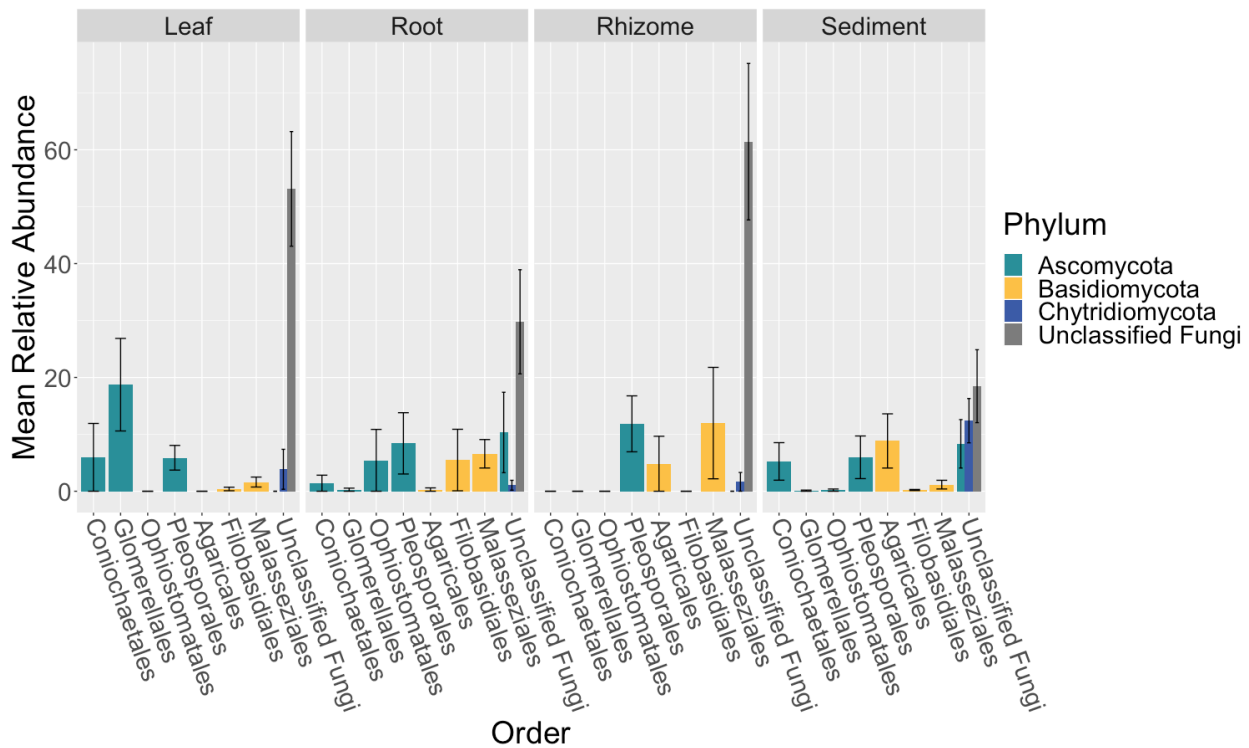

916  
917  
918  
919  
920  
921  
922  
923  
924  
925  
926  
927  
928  
929

930 **Figure 3: Mean relative abundance of unclassifiable fungi increases across leaf length**

931 The mean relative abundance of taxonomic orders with a variance of greater than 0.1 percent are  
932 shown across leaf segments, 0-5 inches (n = 10), 5-10 inches (n = 10), 10-15 inches (n = 10), 15-  
933 20 inches (n = 10) and 20-25 inches (n = 10), with the standard error of the mean represented by  
934 error bars and bars colored by taxonomic phylum. The dataset was first subset to a depth of  
935 5,000 sequences per sample, collapsed at the order level using the tax\_glom function in phyloseq  
936 (McMurdie and Holmes, 2013) and then converted into relative abundance values. Taxonomy  
937 was inferred for ITS2 amplicon sequence variants using the RDP Naive Bayesian Classifier  
938 algorithm with a modified UNITE (v. 8.0) database (UNITE Community, 2019; Wang et al.,  
939 2007).

940

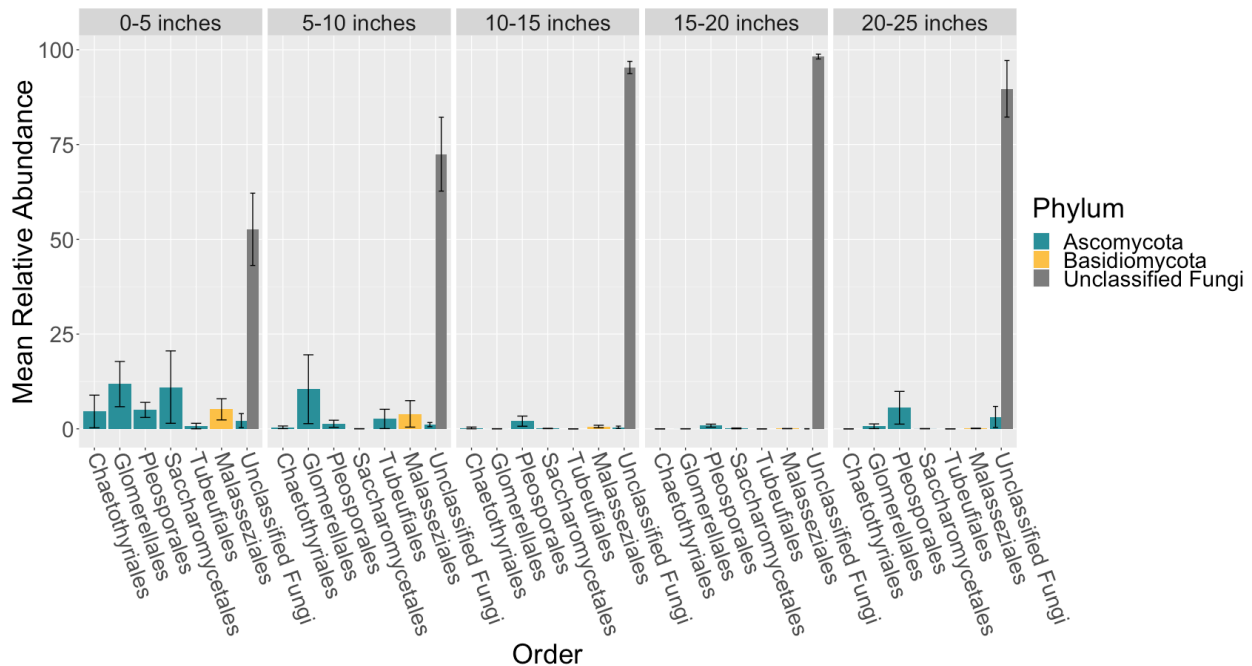

941

942

943

944

945

946

947

948

949

950

951

952

953

954

955 **Figure 4: Mean relative abundance of amplicon sequence variants (ASVs) across leaf**  
956 **length**

957 The mean relative abundance of ASVs with a mean of greater than two percent are shown across  
958 leaf segments, 0-5 inches (n = 10), 5-10 inches (n = 10), 10-15 inches (n = 10), 15-20 inches (n =  
959 10) and 20-25 inches (n = 10), with the standard error of the mean represented by error bars and  
960 bars colored by taxonomic phylum. The dataset was first subset to a depth of 5,000 sequences  
961 per sample and then converted into relative abundance values. ASVs were grouped into  
962 complexes if ASVs shared greater than 99% sequence identity. Taxonomy was inferred for ITS2  
963 ASVs using the RDP Naive Bayesian Classifier algorithm with a modified UNITE (v. 8.0)  
964 database (UNITE Community, 2019; Wang et al., 2007).  
965

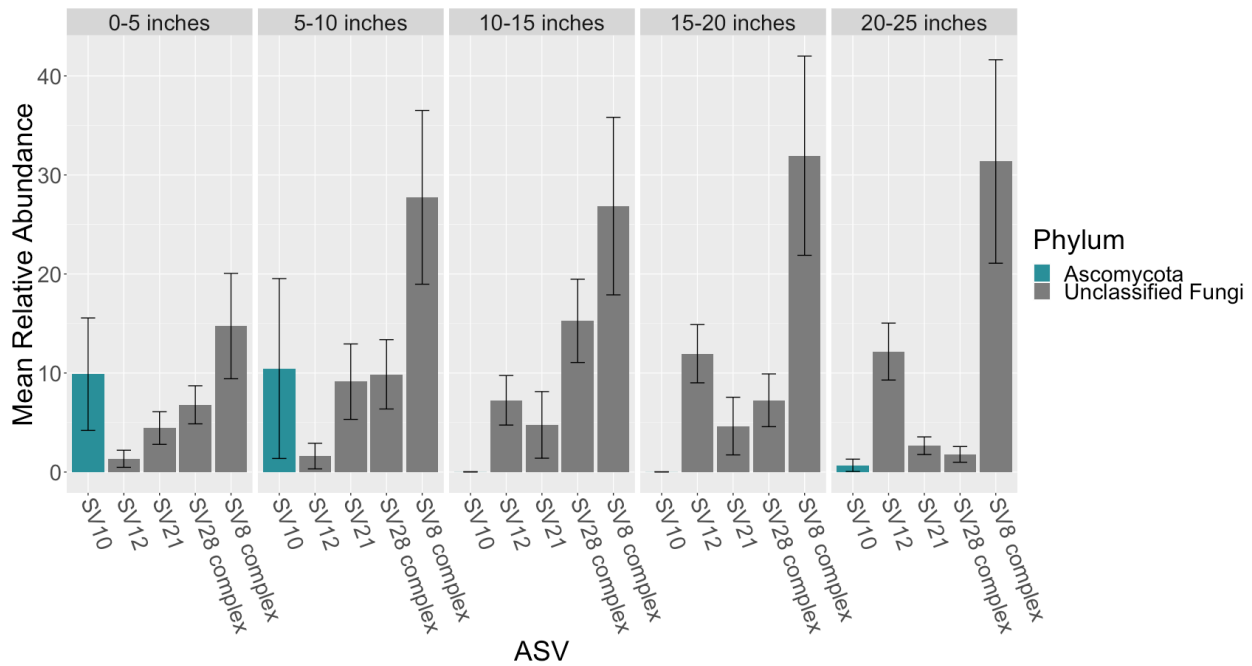

966  
967  
968  
969  
970  
971  
972  
973  
974  
975  
976  
977  
978  
979  
980

981 **Figure 5: Phylogenetic placement of the SV8 complex in Chytridiomycota**

982 A molecular phylogeny of 28S rRNA genes was constructed using Bayesian inference. Sequence  
 983 alignments were generated using MAFFT (v. 7.402) on the CIPRES Science Gateway web  
 984 server, trimmed using trimAl (v.1.2) and a phylogenetic tree was inferred on the trimmed  
 985 alignment with a GTR + G + I model using MrBayes (v. 3.2.2) (Huelsenbeck and Ronquist,  
 986 2001; Katoh, 2002; Miller et al., 2010). Displayed at each node in the tree are the Bayesian  
 987 posterior probabilities (first number) estimated with MrBayes (v. 3.2.2) and the maximum  
 988 likelihood bootstrap values (second number) calculated with RAxML (v. 8) (Stamatakis, 2014).  
 989 The SV8 complex represents a series of four abundant ASVs (SV8, SV11, SV16, SV56) that are  
 990 greater than 99% identical. The 28S rRNA gene sequences for the SV8 complex are named SV8-  
 991 108A\_CLE and SV8-109A\_CLE in this phylogeny and were amplified from two leaf epiphyte  
 992 samples (sample IDs: 108A and 109A). The GenBank accession numbers of the sequences used  
 993 to build this phylogeny can be found in Table S4.

994  
 995

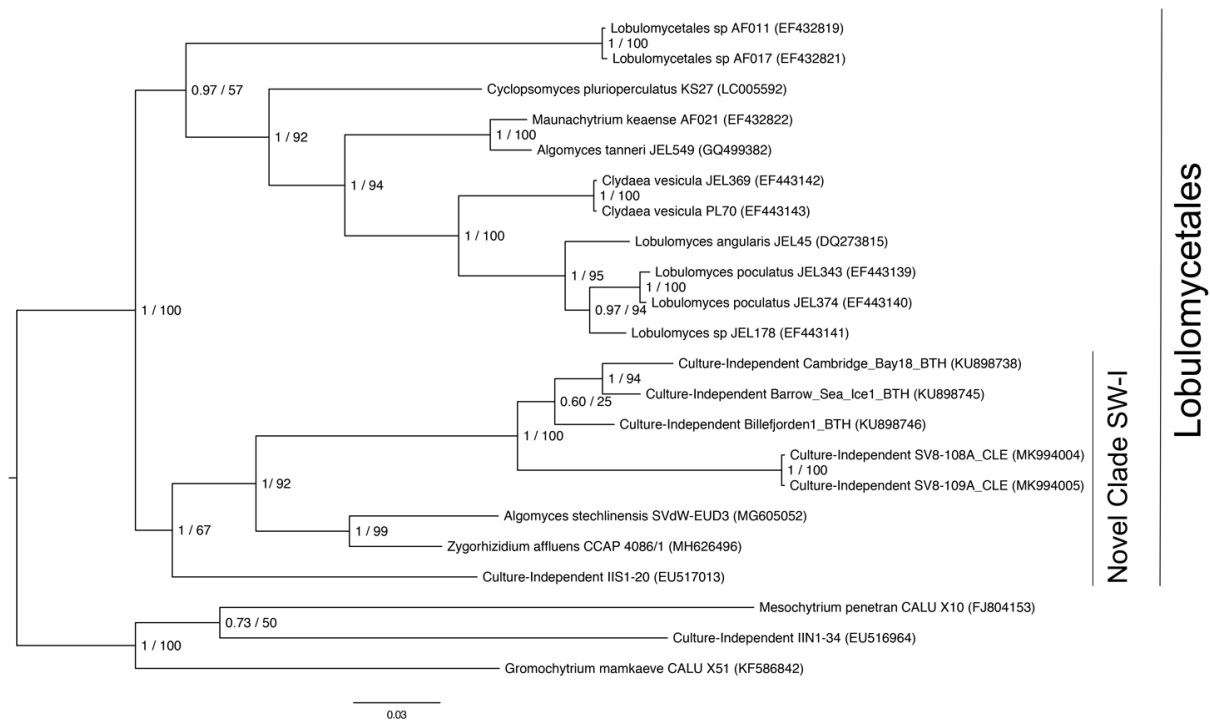

996  
 997  
 998  
 999
