# Supplementary material for: Characterization of the mycobiome of the seagrass, Zostera marina, reveals putative associations with marine chytrids
Source: bioRxiv preprint, doi:10.1101/735050, version 3 (2019-08-24)
Supplement: Supplemental RMarkdown file [file 735050_file04.xlsx]

## Sheet: TableS1
Table S1: Number of samples extracted for bulk sample type comparisons
Location	Westside Point			Gaffney Point	Total number of samples
Time Point	T1	T2	T3	T1
Leaves	5	5	5	5	20
Roots	3	6	6	0	15
Sediment	5	5	5	5	20
Rhizome	0	4	6	0	10
Control Sediment	3	3	3	0	9

## Sheet: TableS2
Table S2: Number of samples extracted for intra-plant and epiphyte / endophyte analysis
Location	Westside Point	Total number of samples
Time Point	T3
Leaves	25	25
Roots	30	30
Sediment	27	27
Rhizome	6	6
Control Sediment	5	5

## Sheet: TableS3
Table S3: Number of control samples extracted during this experiment
Sample Type	Total number of samples
H20	3
EtOH	3
Epiphyte Buffer	3
Kit Control	3
Zymo Mock Community	3

## Sheet: TableS4
Table S4: Sequences used in SV8 complex molecular phylogeny
Clade	Species	Strain	GenBank Assession	Study
Lobulomycetales	Uncultured	SV8-108A_CLE	MK994004
Lobulomycetales	Uncultured	SV8-109A_CLE	MK994005
Lobulomycetales	Undescribed	AF011	EF432819	Simmons et al 2009
Lobulomycetales	Undescribed	AF017	EF432821	Simmons et al 2009
Lobulomycetales	Maunachytrium keaense	AF021	EF432822	Simmons et al 2009
Lobulomycetales	Lobulomyces angularis	JEL45	DQ273815	Simmons et al 2009
Lobulomycetales	Undescribed	JEL178	EF443141	Simmons et al 2009
Lobulomycetales	Lobulomyces poculatus	JEL343	EF443139	Simmons et al 2009
Lobulomycetales	Clydaea vesicula	JEL369	EF443142	Simmons et al 2009
Lobulomycetales	Lobulomyces poculatus	JEL374	EF443140	Simmons et al 2009
Lobulomycetales	Clydaea vesicula	PL70	EF443143	Simmons et al 2009
Lobulomycetales	Cyclopsomyces plurioperculatus	KS27	LC005592	Seto and Degawa 2015
Lobulomycetales	Algomyces stechlinensis	SVdW-EUD3	MG605052	Wyngaert et al 2018
Lobulomycetales	Uncultured	Barrow_Sea_Ice1_BTH	KU898745	Hassett et al 2017
Lobulomycetales	Uncultured	Cambridge_Bay18_BTH	KU898738	Hassett et al 2017
Lobulomycetales	Uncultured	Billefjorden1_BTH	KU898746	Hassett et al 2017
Lobulomycetales	Zygorhizidium affluens	CCAP 4086/1	MH626496	Rad-Menendex et al 2018
Lobulomycetales	Algomyces tanneri	JEL549	GQ499382	Rad-Menendex et al 2018
Lobulomycetales	Uncultured	IIS1-20	EU517013	Karpov et al 2014
Gromochytriales	Uncultured	IIN1-34	EU516964	Karpov et al 2014
Gromochytriales	Gromochytrium mamkaeve	CALU X51	KF586842	Wyngaert et al 2018
Mesochytriales	Mesochytrium penetran	CALU X10	FJ804153	Wyngaert et al 2018

## Sheet: TableS5
Table S5: Kruskal–Wallis tests on alpha diversity metrics
Category	Metric	Chi-squared	P (perm)
Bulk sample type	Observed number of ASVs	21.075	< 0.001
	Shannon	15.408	< 0.001
Root epiphytes vs. endophytes	Observed number of ASVs	0.209	0.653
	Shannon	0.018	0.907
Leaf epiphtyes vs. endophytes	Observed number of ASVs	0.422	0.525
	Shannon	4.432	0.037

## Sheet: TableS6
Table S6: Post-hoc Dunn tests assessing alpha diversity between bulk sample types
Metric	Pair-wise comparison	Z score	p-value	Bonferroni corrected p-value
Observed number of ASVs	Leaf vs. Rhizome	3.10533	0.0019007	0.0114042
	Leaf vs. Root	2.42851	0.015161	0.0909661
	Rhizome vs. Root	-1.12424	0.26091	1
	Leaf vs. Sediment	-0.82153	0.411344	1
	Rhizome vs. Sediment	-3.86051	< 0.001	< 0.001
	Root vs. Sediment	-3.35479	< 0.001	0.00476547
Shannon	Leaf vs. Rhizome	2.75109	0.00593971	0.0356383
	Leaf vs. Root	2.15447	0.0312029	0.187218
	Rhizome vs. Root	-0.993507	0.320463	1
	Leaf vs. Sediment	-0.615637	0.538134	1
	Rhizome vs. Sediment	-3.32727	< 0.001	0.00526212
	Root vs. Sediment	-2.86081	0.00422555	0.0253533

## Sheet: TableS7
Table S7: Permanova results of beta diversity of bulk sample types
Category	Pseudo-F	R2	p-value	Bonferroni corrected p-value
Sample type	2.14936	0.125332	< 0.001	< 0.001
Timepoint	1.39331	0.0571184	0.0186	0.1116
Replicate core number	1.48315	0.030591	0.0351	0.2106
Zymo 96-well sequencing plate	0.778439	0.0162927	0.8438	1
Randomized DNA extraction group	1.03066	0.297945	0.3035	1
DNA extraction kit lot number	0.78578	0.0164438	0.8379	1

## Sheet: TableS8
Table S8: Pairwise PERMANOVA results of beta diversity of bulk sample types
Pairwise comparison	Pseudo-F	R2	p-value	Bonferroni corrected p-value
Root vs. Rhizome	2.07242	0.0983476	0.0024	0.0144
Leaf vs. Rhizome	3.67926	0.169713	< 0.001	< 0.001
Leaf vs. Root	1.80687	0.0674032	0.0106	0.0636
Sediment vs. Rhizome	2.58436	0.114431	< 0.001	0.0036
Sediment vs. Root	1.04348	0.0372092	0.3573	1
Sediment vs. Leaf	2.52343	0.0884686	< 0.001	< 0.001

## Sheet: TableS9
Table S9: Betadisper results of beta diversity of bulk sample types
Category	F	p-value	Bonferroni corrected p-value
Replicate core number	1.68065	0.1688	1
Timepoint	0.225449	0.801	1
Zymo 96-well sequencing plate	0.337503	0.7182	1
Randomized DNA extraction group	4.91508	< 0.001	0.001
DNA extraction kit lot number	0.000844243	0.9761	1
Sample type	6.70867	< 0.001	0.004

## Sheet: TableS10
Table S10: Tukey HSD Post-hoc tests of beta diversity dispersions
Category	Pairwise comparison	p adj
Sample Type	Rhizome vs. Leaf	0.0921576
	Root vs. Leaf	0.216653
	Sediment vs. Leaf	0.315773
	Root vs. Rhizome	0.0010679
	Sediment vs. Rhizome	0.0017748
	Sediment vs. Root	0.993591
Randomized DNA extraction group	B vs. A	1
	C vs. A	0.995631
	D vs. A	1
	E vs. A	0.995396
	F vs. A	0.999893
	G vs. A	< 0.001
	H vs. A	0.998804
	I vs. A	< 0.001
	K vs. A	1
	L vs. A	1
	M vs. A	0.998985
	N vs. A	1
	O vs. A	0.990482
	P vs. A	1
	C vs. B	0.999917
	D vs. B	1
	E vs. B	0.99991
	F vs. B	1
	G vs. B	0.0016713
	H vs. B	0.999996
	I vs. B	0.0016713
	K vs. B	1
	L vs. B	0.999958
	M vs. B	0.999999
	N vs. B	1
	O vs. B	0.999714
	P vs. B	1
	D vs. C	0.998781
	E vs. C	1
	F vs. C	1
	G vs. C	0.0193657
	H vs. C	1
	I vs. C	0.0193657
	K vs. C	0.999972
	L vs. C	0.942977
	M vs. C	1
	N vs. C	0.998771
	O vs. C	1
	P vs. C	0.999912
	E vs. D	0.9987
	F vs. D	0.999992
	G vs. D	0.000561
	H vs. D	0.99981
	I vs. D	0.000561
	K vs. D	1
	L vs. D	0.999988
	M vs. D	0.999873
	N vs. D	1
	O vs. D	0.996833
	P vs. D	1
	F vs. E	1
	G vs. E	0.0195883
	H vs. E	1
	I vs. E	0.0195883
	K vs. E	0.999969
	L vs. E	0.941223
	M vs. E	1
	N vs. E	0.998689
	O vs. E	1
	P vs. E	0.999904
	G vs. F	0.0041374
	H vs. F	1
	I vs. F	0.0041374
	K vs. F	1
	L vs. F	0.988788
	M vs. F	1
	N vs. F	0.999992
	O vs. F	1
	P vs. F	1
	H vs. G	0.005918
	I vs. G	1
	K vs. G	0.0019654
	L vs. G	< 0.001
	M vs. G	0.0032919
	N vs. G	0.00056
	O vs. G	0.0232035
	P vs. G	0.0016549
	I vs. H	0.005918
	K vs. H	0.999999
	L vs. H	0.960009
	M vs. H	1
	N vs. H	0.999808
	O vs. H	1
	P vs. H	0.999996
	K vs. I	0.0019654
	L vs. I	< 0.001
	M vs. I	0.0032919
	N vs. I	0.00056
	O vs. I	0.0232035
	P vs. I	0.0016549
	L vs. K	0.999838
	M vs. K	1
	N vs. K	1
	O vs. K	0.999888
	P vs. K	1
	M vs. L	0.951828
	N vs. L	0.999988
	O vs. L	0.910632
	P vs. L	0.999962
	N vs. M	0.999871
	O vs. M	1
	P vs. M	0.999999
	O vs. N	0.996811
	P vs. N	1
	P vs. O	0.999699

[truncated: 13 more sheets: TableS11, TableS12, TableS13, TableS14, TableS15, TableS16, TableS17, TableS18, TableS19, TableS20, TableS21, TableS22, TableS23]
